# Supplementary material
Source: PubMed Central journal article supplement (PMC9934834)
Supplement: JGMED22002221.pdf [file JGMED22002221.pdf]

**Internal Medicine: Foundations EPA #6**

**Discussing and establishing patients' goals of care**

Key Features:

- This EPA focuses on the documentation of a patient's previous advanced directives and/or goals of care, and not those discussions that are directed at changes in goals of care (that is an EPA of the Core stage).
- This EPA includes discussing goals of care with a substitute decision-maker.
- This EPA may be observed in the clinical setting or in simulation (e.g. OSCE).

Assessment Plan:

Direct and/or indirect observation by supervisor

Collect at least 3 observations of achievement

- 1 from each category
- Not more than 1 in simulation setting
- At least 1 involves a substitute decision-maker
- At least 2 observations by staff
- At least 2 different assessors

**\*Basis of Assessment**

-- Please Select --

**\*Case Complexity**

-- Please Select --

**\*Clinical Setting**

-- Please Select --

**\*Observer's Role**

-- Please Select --

**Milestones**

**Identify patients who lack decision-making capacity and seek out their substitute decision maker**

- Not observed
- In Progress
- Achieved

**Identify, verify and validate non-verbal cues**

**Discuss and clarify previously established advanced directives and goals of care**

**Discuss with the patient and family the degree of uncertainty inherent in all clinical situations**

▸ Document information about patients and their medical conditions in a manner than enhances intra- and interprofessional care

▸ Adhere to institutional policies and procedures relevant to advance directives and goals of care

▸ Optimize the physical environment for patient comfort, privacy, engagement and safety

▼ **\*Based on this observation of resident performance overall:**

- I had to do
- I had to talk them through
- I had to direct them from time to time
- I needed to be available just in case
- I did not need to be there

**Comments (mandatory)**

Please select a response before adding a comment.

Next Steps

Concerns

▼ **Do you have patient safety concerns related to this resident's performance?**

No

No

Yes

▸ **Do you have professionalism concerns about this resident's performance?**

No

▸ **Are there other reasons to flag this assessment?**

No

▼ **\*Have feedback about this form? (eg, "Missing Dx", etc.)**

No

No

Yes

Save as Draft

or

Submit

Madrazo L, Cruz JD, Correa N, Puka K, Kane S-L. Evaluating the quality of written feedback within entrustable professional activities in an internal medicine cohort. *J Grad Med Educ.* 2023;15(1):x-x. DOI:<http://dx.doi.org/10.4300/JGME-D-22-00222.1>

### **Entrustable Professional Activities Analyzed**

#### **Transition to Discipline**

|    |                                                                                                                                        |
|----|----------------------------------------------------------------------------------------------------------------------------------------|
| D1 | Performing histories and physical exams, documenting and presenting findings, across clinical settings for initial and subsequent care |
| D2 | Identifying and assessing unstable patients, providing initial management, and obtaining help                                          |
| D3 | Performing the basic procedures of Internal Medicine                                                                                   |

#### **Foundations of Discipline**

|    |                                                                                                                                   |
|----|-----------------------------------------------------------------------------------------------------------------------------------|
| F1 | Assessing, diagnosing, and initiating management for patients with common acute medical presentations in acute care settings      |
| F2 | Managing patients admitted to acute care settings with common medical problems and advancing their care plans                     |
| F3 | Consulting specialists and other health professionals, synthesizing recommendations, and integrating these into the care plan     |
| F4 | Formulating, communicating, and implementing discharge plans for patients with common medical conditions from acute care settings |
| F5 | Assessing unstable patients, providing targeted treatment and consulting as needed                                                |
| F6 | Discussing and establishing patient's goals of care                                                                               |
| F7 | Identifying personal learning needs while caring for patients and addressing those needs                                          |

Madrazo L, Cruz JD, Correa N, Puka K, Kane S-L. Evaluating the quality of written feedback within entrustable professional activities in an internal medicine cohort. *J Grad Med Educ.* 2023;15(1):74-80. DOI:<http://dx.doi.org/10.4300/JGME-D-22-00222.1>

### **Entrustable Professional Activities Analyzed**

#### **Transition to Discipline**

|    |                                                                                                                                        |
|----|----------------------------------------------------------------------------------------------------------------------------------------|
| D1 | Performing histories and physical exams, documenting and presenting findings, across clinical settings for initial and subsequent care |
| D2 | Identifying and assessing unstable patients, providing initial management, and obtaining help                                          |
| D3 | Performing the basic procedures of Internal Medicine                                                                                   |

#### **Foundations of Discipline**

|    |                                                                                                                                   |
|----|-----------------------------------------------------------------------------------------------------------------------------------|
| F1 | Assessing, diagnosing, and initiating management for patients with common acute medical presentations in acute care settings      |
| F2 | Managing patients admitted to acute care settings with common medical problems and advancing their care plans                     |
| F3 | Consulting specialists and other health professionals, synthesizing recommendations, and integrating these into the care plan     |
| F4 | Formulating, communicating, and implementing discharge plans for patients with common medical conditions from acute care settings |
| F5 | Assessing unstable patients, providing targeted treatment and consulting as needed                                                |
| F6 | Discussing and establishing patient's goals of care                                                                               |
| F7 | Identifying personal learning needs while caring for patients and addressing those needs                                          |
